# Supplementary material for: Identification and Validation of Lipid Metabolism-Related LncRNA Prognostic Signature for Patients with Osteosarcoma
Source: Research Square preprint supplement (doi:10.21203/rs.3.rs-2318090/v1), 2022-12-16
Supplement: Supplementary file 3 [file 3bdcbb93595f614b364627a8.xlsx]

## Sheet: ssGSEA.result
id	TARGET-40-PASUUH-01A	TARGET-40-PAUTWB-01A	TARGET-40-PAKUZU-01A	TARGET-40-0A4I0S-01A	TARGET-40-PARJXU-01A	TARGET-40-PAPWWC-01A	TARGET-40-PAUUML-01A	TARGET-40-PAMHLF-01A	TARGET-40-PAUBIT-01A	TARGET-40-PASFCV-01A	TARGET-40-PARDAX-01A	TARGET-40-0A4I4O-01A	TARGET-40-0A4I48-01A	TARGET-40-PASEFS-01A	TARGET-40-PARKAF-01A	TARGET-40-PATUXZ-01A	TARGET-40-PAMHYN-01A	TARGET-40-PASEBY-01A	TARGET-40-PANMIG-01A	TARGET-40-PAKFVX-01A	TARGET-40-PASNZV-01A	TARGET-40-0A4I4M-01A	TARGET-40-PAMYYJ-01A	TARGET-40-PAVECB-01A	TARGET-40-0A4I42-01A	TARGET-40-PASYUK-01A	TARGET-40-PALECC-01A	TARGET-40-PAMLKS-01A	TARGET-40-PANSEN-01A	TARGET-40-PALHRL-01A	TARGET-40-PANZHX-01A	TARGET-40-PALKDP-01A	TARGET-40-0A4I65-01A	TARGET-40-0A4I6O-01A	TARGET-40-PALFYN-01A	TARGET-40-PATPBS-01A	TARGET-40-PAPXGT-01A	TARGET-40-0A4I4E-01A	TARGET-40-0A4HLD-01A	TARGET-40-PAUYTT-01A	TARGET-40-0A4I0W-01A	TARGET-40-PARFTG-01A	TARGET-40-0A4HX8-01A	TARGET-40-PAUTYB-01A	TARGET-40-PATMXR-01A	TARGET-40-PAPKWD-01A	TARGET-40-PAPNVD-01A	TARGET-40-PATMPU-01A	TARGET-40-PAPFLB-01A
Activated B cell	0.267675	0.123643	0.235639	0.182339	0.133825	0.141343	0.0548526	0.130533	0.115056	0.114176	0.0789755	0.0590671	0.179498	0.0614749	0.0449968	0.0902219	0.119265	0.0777296	0.209835	0.153593	0.242237	0.188828	0.108395	0.212193	0.127822	0.471296	0.0953543	0.174526	0.0857834	0.0940587	0.25349	0.122348	0.159101	0.077528	0.369903	0.117526	0.138752	0.135381	0.181952	0.0888575	0.173723	0.16016	0.198028	0.258677	0.0623775	0.0601484	0.0539572	0.103995	0.0567162
Activated CD4 T cell	0.546227	0.454206	0.474163	0.437258	0.438828	0.474372	0.414775	0.451679	0.423542	0.517453	0.599254	0.516398	0.506958	0.435642	0.475448	0.45168	0.492816	0.581929	0.384015	0.537824	0.572193	0.563462	0.422316	0.404016	0.496408	0.67757	0.513998	0.47616	0.451107	0.42527	0.575795	0.516116	0.461034	0.458508	0.585355	0.584097	0.568053	0.362506	0.505731	0.471234	0.481392	0.518873	0.510436	0.540347	0.582911	0.575211	0.481954	0.517988	0.545634
Activated CD8 T cell	0.900804	0.521641	0.499351	0.490792	0.444171	0.597627	0.391649	0.457208	0.508177	0.530549	0.465905	0.502799	0.503147	0.391127	0.543094	0.436525	0.544927	0.599925	0.417086	0.457561	0.552652	0.548115	0.485802	0.394891	0.439266	0.807527	0.538461	0.504847	0.442477	0.552567	0.617065	0.448894	0.41711	0.475957	0.760524	0.472353	0.635917	0.373965	0.504542	0.434115	0.456988	0.513324	0.467156	0.688057	0.444451	0.474486	0.445889	0.41869	0.455425
Central memory CD4 T cell	0.907059	0.944967	0.906959	0.995271	0.952873	0.895867	0.851161	0.937233	0.935866	0.963938	0.837926	0.917825	0.915598	0.786285	0.954156	0.882291	0.906455	0.908855	0.957265	0.915544	0.879184	0.92872	0.942188	0.946253	0.919173	0.975228	0.97305	0.829059	0.899775	0.9146	0.945257	0.853921	0.927907	0.933182	0.972754	0.931834	0.920649	0.913035	0.899105	0.881376	0.923415	0.887029	0.853631	0.885813	0.889659	0.857851	0.870778	0.902196	0.950113
Central memory CD8 T cell	0.737544	0.774702	0.660947	0.820044	0.713893	0.738008	0.604063	0.693168	0.707164	0.796547	0.715299	0.73166	0.784752	0.651497	0.728033	0.698991	0.761553	0.741273	0.743274	0.730722	0.764538	0.817615	0.696569	0.752481	0.712216	0.770057	0.751812	0.64031	0.728749	0.691861	0.740442	0.714065	0.737249	0.772093	0.755857	0.751967	0.800284	0.652261	0.765286	0.64175	0.710671	0.728117	0.713956	0.656739	0.721236	0.698253	0.554223	0.700435	0.7794
Effector memeory CD4 T cell	0.499998	0.534301	0.525611	0.65471	0.625699	0.55985	0.583825	0.558833	0.593552	0.583621	0.565467	0.573474	0.536048	0.577287	0.539533	0.529789	0.5639	0.551754	0.564368	0.555295	0.591633	0.5394	0.59967	0.534062	0.564531	0.699249	0.585569	0.520266	0.55611	0.560819	0.622043	0.560353	0.54951	0.593235	0.563993	0.597064	0.525614	0.567337	0.520519	0.607003	0.528389	0.605221	0.545331	0.572795	0.603656	0.540404	0.552737	0.550756	0.610701
Effector memeory CD8 T cell	0.754005	0.670992	0.60424	0.748632	0.615393	0.652157	0.482003	0.625714	0.662305	0.705424	0.571675	0.541224	0.680667	0.367231	0.579751	0.562573	0.608635	0.63587	0.587545	0.506999	0.669694	0.653264	0.598852	0.55168	0.570238	0.750902	0.574626	0.503824	0.580319	0.580967	0.653833	0.505372	0.556322	0.633477	0.724819	0.60168	0.713525	0.490857	0.486027	0.50487	0.603562	0.677389	0.552081	0.698739	0.582508	0.466843	0.519843	0.600118	0.553319
Gamma delta T cell	0.733146	0.750289	0.680141	0.772149	0.674124	0.721232	0.633732	0.681702	0.65898	0.745292	0.710016	0.733921	0.722028	0.589501	0.734652	0.697208	0.746456	0.738502	0.653941	0.752823	0.739861	0.732663	0.766435	0.683556	0.681966	0.792001	0.753703	0.673404	0.70207	0.737672	0.783257	0.696321	0.692631	0.651455	0.726602	0.722296	0.758457	0.649259	0.724071	0.710405	0.712442	0.748057	0.626459	0.764556	0.713649	0.675478	0.698854	0.696629	0.735921
Immature B cell	0.617123	0.509454	0.49535	0.65676	0.430931	0.440877	0.419931	0.477955	0.482612	0.617953	0.445139	0.404372	0.574204	0.19512	0.372863	0.345962	0.53016	0.526644	0.463785	0.35837	0.557501	0.571197	0.390174	0.468473	0.433091	0.664723	0.457544	0.296924	0.493191	0.400297	0.507833	0.372588	0.388001	0.432815	0.571625	0.393669	0.5847	0.33193	0.358107	0.363302	0.48699	0.525472	0.425045	0.549674	0.465303	0.430058	0.273312	0.516927	0.490718
Memory B cell	0.596766	0.662505	0.656453	0.658621	0.694749	0.756366	0.662573	0.672705	0.588636	0.664683	0.688077	0.731697	0.621027	0.649762	0.706045	0.5171	0.698699	0.633959	0.70266	0.674834	0.697254	0.688413	0.644909	0.667098	0.63645	0.71784	0.64508	0.629208	0.681885	0.666116	0.7109	0.64688	0.69465	0.676709	0.688427	0.696712	0.689923	0.631173	0.723132	0.584238	0.762556	0.669718	0.756554	0.618945	0.661195	0.637488	0.589057	0.638697	0.743141
Regulatory T cell	0.635279	0.658613	0.630385	0.688663	0.508924	0.521696	0.44714	0.517432	0.527819	0.708702	0.481046	0.636291	0.63651	0.380984	0.503704	0.493883	0.607111	0.616472	0.598771	0.482816	0.601321	0.658018	0.480097	0.482826	0.506508	0.715215	0.587712	0.451528	0.564906	0.537187	0.60573	0.467594	0.517015	0.549095	0.702401	0.576025	0.656137	0.406812	0.519553	0.473549	0.576163	0.623583	0.442461	0.615233	0.578448	0.463204	0.462873	0.502907	0.564775
T follicular helper cell	0.633474	0.67772	0.690033	0.684218	0.557829	0.639502	0.545212	0.549396	0.606312	0.676173	0.591828	0.542935	0.672468	0.416376	0.639775	0.568507	0.593798	0.652237	0.597408	0.656499	0.671017	0.673688	0.65497	0.585932	0.608733	0.68531	0.683223	0.501517	0.557094	0.589473	0.708705	0.528049	0.668564	0.585774	0.718689	0.646399	0.622847	0.580047	0.562029	0.505574	0.630165	0.64742	0.622923	0.67859	0.592623	0.57042	0.569837	0.649238	0.584066
Type 1 T helper cell	0.559641	0.506105	0.506338	0.563834	0.551624	0.494694	0.470066	0.477554	0.479476	0.567112	0.468777	0.496198	0.528292	0.44532	0.501571	0.466639	0.476471	0.518513	0.508784	0.475545	0.51408	0.542633	0.472689	0.511763	0.470783	0.64156	0.507342	0.434432	0.471293	0.474142	0.546847	0.484013	0.476703	0.521821	0.597	0.487614	0.49228	0.478805	0.547281	0.461556	0.535288	0.487737	0.449189	0.50902	0.497339	0.448863	0.471454	0.49658	0.45707
Type 17 T helper cell	0.415893	0.510449	0.485621	0.517056	0.509912	0.467242	0.358603	0.319824	0.332346	0.456054	0.457534	0.343253	0.434708	0.365384	0.502977	0.471481	0.461555	0.503275	0.409251	0.546276	0.446316	0.423534	0.443021	0.402469	0.492856	0.504611	0.527246	0.345167	0.348069	0.438061	0.513824	0.36738	0.452436	0.356684	0.499894	0.433202	0.45242	0.354662	0.490867	0.372481	0.440621	0.429977	0.41344	0.525438	0.525044	0.401975	0.410021	0.427633	0.330067
Type 2 T helper cell	0.543962	0.514206	0.55312	0.452433	0.548971	0.532093	0.553033	0.550752	0.483999	0.566606	0.599552	0.546365	0.481826	0.641572	0.510052	0.527296	0.562746	0.568931	0.495946	0.504051	0.575164	0.572734	0.528488	0.543967	0.502077	0.626961	0.503098	0.532439	0.575241	0.475315	0.537055	0.514611	0.538289	0.574055	0.512344	0.590031	0.613395	0.50564	0.577136	0.542174	0.530402	0.617519	0.601727	0.533325	0.557107	0.536219	0.577595	0.546127	0.626484
Activated dendritic cell	0.734202	0.719914	0.638733	0.745781	0.644398	0.701292	0.584093	0.672039	0.648882	0.730435	0.675958	0.687902	0.734516	0.568299	0.646042	0.671647	0.659324	0.727103	0.671058	0.639108	0.710745	0.718572	0.685172	0.690312	0.728287	0.74197	0.720396	0.623028	0.663956	0.678597	0.708835	0.611176	0.725499	0.667433	0.733519	0.671299	0.678298	0.632928	0.634329	0.607733	0.707378	0.714672	0.693062	0.67315	0.705964	0.65221	0.650019	0.68493	0.66028
CD56bright natural killer cell	0.691709	0.648661	0.628221	0.678837	0.59955	0.728413	0.590428	0.631651	0.699498	0.734837	0.587706	0.625292	0.633782	0.631641	0.639455	0.589829	0.644645	0.67446	0.587841	0.711364	0.661606	0.679185	0.610267	0.60461	0.624486	0.697037	0.659825	0.620227	0.607938	0.649322	0.679722	0.552603	0.618897	0.651066	0.667173	0.652734	0.645455	0.609224	0.616927	0.62554	0.633418	0.647047	0.66597	0.643754	0.610254	0.649924	0.647739	0.651523	0.626604
CD56dim natural killer cell	0.714233	0.779196	0.848261	0.754772	0.800222	0.819407	0.750939	0.800111	0.868578	0.79966	0.792777	0.844757	0.838284	0.677203	0.901374	0.80367	0.828064	0.835908	0.760669	0.817031	0.766096	0.783336	0.775391	0.770404	0.837594	0.719462	0.875805	0.694453	0.763838	0.882902	0.777261	0.667667	0.840886	0.830646	0.802694	0.825285	0.781245	0.795038	0.816068	0.781316	0.776752	0.812233	0.723195	0.823584	0.800556	0.719903	0.705356	0.799788	0.747006
Eosinophil	0.208969	0.197605	0.159759	0.32129	0.440668	0.240065	0.209351	0.13041	0.232083	0.26742	0.283058	0.164285	0.352578	0.141256	0.259384	0.235802	0.256071	0.215297	0.228878	0.318505	0.197859	0.272514	0.221524	0.166576	0.330498	0.325765	0.249331	0.26324	0.157392	0.198921	0.248311	0.239677	0.269589	0.197785	0.189795	0.223292	0.244508	0.179133	0.300822	0.133968	0.157048	0.200192	0.192999	0.154704	0.218988	0.293073	0.124436	0.219866	0.280182
Monocyte	0.751268	0.750811	0.734875	0.782459	0.700562	0.71705	0.660656	0.711506	0.725157	0.744189	0.710557	0.665487	0.766217	0.661345	0.725198	0.696272	0.717871	0.72606	0.702343	0.741033	0.728299	0.759178	0.722037	0.735712	0.709557	0.756021	0.741643	0.686251	0.69734	0.739016	0.74881	0.694854	0.738585	0.702294	0.78027	0.722367	0.759912	0.695636	0.718196	0.771876	0.726185	0.743446	0.709938	0.741931	0.708902	0.705864	0.682591	0.687952	0.72319
Natural killer cell	0.67462	0.692703	0.665004	0.719169	0.675211	0.59738	0.642218	0.658427	0.659166	0.677742	0.624831	0.66362	0.703287	0.609099	0.635002	0.645312	0.661421	0.681312	0.654816	0.610553	0.675033	0.684793	0.691703	0.642663	0.57519	0.79841	0.647957	0.547376	0.638637	0.679141	0.691937	0.646542	0.622298	0.646727	0.732798	0.656039	0.691888	0.647056	0.661184	0.659271	0.653382	0.689788	0.69184	0.670234	0.623864	0.573003	0.610398	0.618297	0.663686
Natural killer T cell	0.566382	0.565226	0.56092	0.56533	0.597899	0.50189	0.513338	0.565213	0.527575	0.588179	0.546597	0.524997	0.61841	0.495518	0.507906	0.544083	0.530832	0.591123	0.572382	0.475621	0.53039	0.613367	0.538618	0.585744	0.512604	0.639771	0.517059	0.505471	0.565697	0.509852	0.58088	0.528308	0.578429	0.601676	0.636992	0.568705	0.572643	0.52083	0.539786	0.512366	0.585041	0.554765	0.526601	0.575976	0.550056	0.530248	0.562707	0.529589	0.502884
Neutrophil	0.0837274	0.164909	0.0893376	0.194716	0.1193	0.10636	0.00103564	0.0481394	0.082363	0.144058	0.0826989	0.0273452	0.155821	0.0381079	0.156892	0.0567303	0.108307	0.161182	0.0585783	0.102887	0.125555	0.179964	0.0765361	0.0470566	0.19627	0.129398	0.0958539	0.0773563	0.0189739	0.0770792	0.194825	0.0768818	0.0790649	0.0455391	0.146361	0.130461	0.0933045	0.0606609	0.145648	0.104846	0.147495	0.0957719	0.0667876	0.128323	0.125418	0.0891896	0.0542424	0.16547	0.0555553
Plasmacytoid dendritic cell	0.850082	0.890676	0.877344	0.924939	0.868165	0.856868	0.85102	0.880291	0.859841	0.892543	0.866341	0.865625	0.867018	0.834177	0.877838	0.873343	0.867214	0.888651	0.880973	0.861464	0.885064	0.877036	0.871003	0.911928	0.8754	0.923737	0.884236	0.788615	0.882727	0.811686	0.885957	0.851776	0.883669	0.874873	0.879113	0.881779	0.920425	0.859021	0.889343	0.838952	0.890674	0.886447	0.845943	0.870414	0.873555	0.833012	0.814815	0.868979	0.854487
Immature dendritic cell	0.689041	0.696436	0.667913	0.794904	0.667127	0.706691	0.62701	0.7325	0.684502	0.729816	0.692227	0.707684	0.699178	0.687947	0.755883	0.746829	0.692544	0.667352	0.650681	0.74488	0.724692	0.691974	0.725127	0.657318	0.741061	0.727194	0.755461	0.668237	0.691033	0.722426	0.744885	0.684597	0.713535	0.687606	0.693309	0.746106	0.744948	0.692334	0.646858	0.707869	0.680845	0.720588	0.64066	0.706729	0.710065	0.772489	0.663368	0.767717	0.749604
Macrophage	0.484736	0.528399	0.440182	0.618652	0.396364	0.444388	0.293246	0.431468	0.498682	0.596889	0.381455	0.466291	0.508899	0.310349	0.448501	0.300969	0.522941	0.481758	0.414992	0.399624	0.444817	0.503623	0.404805	0.492222	0.372402	0.571255	0.459966	0.427827	0.395544	0.467711	0.517921	0.338088	0.440989	0.362589	0.551572	0.466943	0.501446	0.373831	0.379778	0.436093	0.503159	0.469944	0.426502	0.507314	0.370476	0.355898	0.34542	0.378153	0.439267
Mast cell	0.392867	0.409274	0.388077	0.446457	0.505468	0.381758	0.286325	0.341482	0.335596	0.419983	0.347986	0.360127	0.419928	0.362927	0.351489	0.44715	0.385042	0.376501	0.34974	0.342438	0.36122	0.419186	0.364369	0.320003	0.39735	0.451034	0.386554	0.298122	0.331649	0.375193	0.417806	0.299685	0.384675	0.486156	0.368604	0.332847	0.52772	0.312164	0.448924	0.346174	0.412252	0.455109	0.341684	0.362365	0.361849	0.379175	0.328837	0.332203	0.298909
MDSC	0.853874	0.701958	0.55536	0.818454	0.486871	0.574239	0.375604	0.540622	0.580552	0.842763	0.52753	0.664165	0.780292	0.36906	0.502204	0.510569	0.667892	0.669375	0.520971	0.530433	0.70676	0.809709	0.552384	0.518625	0.606571	0.924036	0.650241	0.561407	0.52526	0.730924	0.761132	0.442697	0.586384	0.525847	0.832771	0.553789	0.730167	0.456338	0.640415	0.480905	0.68548	0.654382	0.516189	0.74494	0.530009	0.471401	0.503736	0.553751	0.658736
[truncated: 73 more columns]
